# Supplementary material
Source: ML conference proceedings conference paper supplement (https://proceedings.neurips.cc/paper_files/paper/2019/hash/7283518d47a05a09d33779a17adf1707-Abstract.html)
Supplement: Supplementary file [file 7283518d47a05a09d33779a17adf1707-Supplemental.zip]

---

# Individual Regret in Cooperative Nonstochastic Multi-Armed Bandits

---

**Yogev Bar-On**

Tel Aviv University, Israel  
baronyogev@gmail.com

**Yishay Mansour**

Tel Aviv University, Israel  
and Google Research, Israel  
mansour.yishay@gmail.com

## Abstract

We study agents communicating over an underlying network by exchanging messages, in order to optimize their individual regret in a common nonstochastic multi-armed bandit problem. We derive regret minimization algorithms that guarantee for each agent  $v$  an individual expected regret of  $\tilde{O}\left(\sqrt{\left(1 + \frac{K}{|\mathcal{N}(v)|}\right)T}\right)$ , where  $T$  is the number of time steps,  $K$  is the number of actions and  $\mathcal{N}(v)$  is the set of neighbors of agent  $v$  in the communication graph. We present algorithms both for the case that the communication graph is known to all the agents, and for the case that the graph is unknown. When the graph is unknown, each agent knows only the set of its neighbors and an upper bound on the total number of agents. The individual regret between the models differs only by a logarithmic factor. Our work resolves an open problem from [Cesa-Bianchi et al., 2019b].

## 1 Introduction

The multi-armed bandit (MAB) problem is one of the most basic models for decision making under uncertainty. It highlights the agent's uncertainty regarding the losses it suffers from selecting various actions. The agent selects actions in an online fashion - each time step the agent selects a single action and suffers a loss corresponding to that action. The agent's goal is to minimize its cumulative loss over a fixed horizon of time steps. The agent observes only the loss of the action it selected each step. Therefore, the MAB problem captures well the crucial trade-off between exploration and exploitation, where the agent needs to explore various actions in order to gather information about them.

MAB research discusses two main settings: the stochastic setting, where the losses of each action are sampled i.i.d. from an unknown distribution, and the nonstochastic (adversarial) setting, where we make no assumptions about the loss sequences. In this work we consider the nonstochastic setting and the objective of minimizing the regret - the difference between the agent's cumulative loss and the cumulative loss of the best action in hindsight. It is known that a regret of the order of  $\Theta(\sqrt{KT})$  is the best that can be guaranteed, where  $K$  is the number of actions and  $T$  is the time horizon. In contrast, when the losses of all actions are observed (full-information feedback) the regret can be of the order of  $\Theta(\sqrt{T \ln K})$  (see, e.g., [Cesa-Bianchi and Lugosi, 2006, Bubeck et al., 2012]).

The main focus of our work is to consider agents that are connected in a communication graph, and can exchange messages in each step, in order to reduce their individual regret. This is possible since the losses depend only on the action and the time step, but not on the agent.

One extreme case is when the communication graph is a clique, i.e., any pair of agents can communicate directly. In this case, the agents can run the well known Exp3 algorithm [Auer et al., 2002], and guarantee each a regret of  $O(\sqrt{T \ln K})$ , assuming there are at least  $K$  agents (see [Seldin et al.,

2014, Cesa-Bianchi et al., 2019b]). However, in many motivating applications, such as distributed learning, or communication tasks such as routing, the communication graph is not a clique.

The work of Cesa-Bianchi et al. [2019b] studies a general communication graph, where the agents can communicate in order to reduce their regret. The paper presents the Exp3-Coop algorithm, which achieves an expected regret **when averaged over all agents** of  $\tilde{O}\left(\sqrt{\left(1 + \frac{K}{N}\alpha(G)\right)T}\right)$ , where  $\alpha(G)$  is the independence number of the communication graph  $G$ , and  $N$  is the number of agents. The question of whether it is possible to obtain a low **individual regret**, that holds simultaneously for all agents, was left as an open question. We answer this question affirmatively in this work.

Our main contribution is an individual expected regret bound, which holds for each agent  $v$ , of order

$$\tilde{O}\left(\sqrt{\left(1 + \frac{K}{|\mathcal{N}(v)|}\right)T}\right),$$

where  $\mathcal{N}(v)$  is the set of neighbors of agent  $v$  in the communication graph. We remark that our result also implies the previous average regret bound.

The main idea of our algorithm is to artificially partition the graph into disjoint connected components. Each component has a center agent, which is in some sense the leader of the component. The center agent has (almost) the largest degree in the component, and it selects actions using the Exp3-Coop algorithm. By observing the outcomes of its immediate neighboring agents, the center agent can guarantee its own desired individual regret. The main challenge is to create such components with a relatively small diameter, so that the center will be able to broadcast its information in a short time to all the agents in the component. Special care is given to relate the agents' local parameters (degree) to the global component parameters (degree of the center agent and the broadcast time).

We consider both the case that the communication graph is known to all the agents in advance (the informed setting), and the case that the graph is unknown (the uninformed setting). In the uninformed setting, we assume each agent knows its local neighborhood (i.e., the set of its neighbors), and an upper bound on the total number of agents. The regret bound in the uninformed setting is higher by a logarithmic factor and the algorithm is more complex.

In the next section, we formally define our model, and review preliminary material. Section 3 shows the center-based policy, given a graph partition. We then present our graph partitioning algorithms in Section 4. Overview of the analysis is given in Section 5, while all proofs are deferred to the supplementary material. Our work is concluded in Section 6.

## 1.1 Additional related works

The cooperative nonstochastic MAB setting was introduced by Awerbuch and Kleinberg [2008], where they bound the average regret, when some agents might be dishonest and the communication is done through a public channel (clique network). The previously mentioned [Cesa-Bianchi et al., 2019b], also considers the issue of delays, and presents a bound on the average regret for a general graph of order  $\tilde{O}\left(\sqrt{\left(d + \frac{K}{N}\alpha(G)\right)T} + d\right)$ , when messages need  $d$  steps to arrive. Dist-Hedge, introduced by Sahu and Kar [2017], considers a network of forecasting agents, with delayed and inexact losses, and derives a sub-linear individual regret bound, that also depends on spectral properties of the graph. More recently, Cesa-Bianchi et al. [2019a] studied an online learning model where only a subset of the agents play at each time step, and showed matching upper and lower bounds on the average regret of order  $\sqrt{\alpha(G)T}$  when the set of agents that play each step is chosen stochastically. When the set of agents is chosen arbitrarily, the lower bound becomes  $T$ .

In the stochastic setting, Landgren et al. [2016a,b] presented a cooperative variant of the well-known UCB algorithm, that uses a consensus algorithm for estimating the mean losses, to obtain a low average regret. More cooperative variants of the UCB algorithm that yield a low average regret were presented by Kolla et al. [2018]. They also showed a policy, where like in the methods in this work, agents with a low degree follow the actions of agents with a high degree. Stochastic MAB over P2P communication networks were studied by Szörényi et al. [2013], which showed that the probability to select a sub-optimal arm reduces linearly with the number of peers. The case where only one agent can observe losses was investigated by Kar et al. [2011]. This agent needs to broadcast information through the network, and it was shown this is enough to obtain a low average regret.

Another multi-agent research area involve agents that compete on shared resources. The motivation comes from radio channel selection, where multiple devices need to choose a radio channel, and two or more devices that use the same channel simultaneously interfere with each other. In this setting, many papers assume agents cannot communicate with each other, and do not receive a reward upon collision - where more than one agent tries to choose the same action at the same step. The first to give regret bounds on this variant are [Avner and Mannor \[2014\]](#), that presented an average regret bound of order  $O\left(T^{\frac{2}{3}}\right)$  in the stochastic setting. Also in the stochastic setting, [Rosenski et al. \[2016\]](#) showed an expected average regret bound of order  $O\left(\frac{K}{\Delta^2} \ln\left(\frac{K}{\delta}\right) + N\right)$  that holds with probability  $1 - \delta$ , where  $\Delta$  is the minimal gap between the mean rewards (notice that this bound is independent of  $T$ ). In the same paper, they also studied the case that the number of agents may change each step, and presented a regret bound of  $\tilde{O}\left(\sqrt{xT}\right)$ , where  $x$  is the total number of agents throughout the game. [Bistriz and Leshem \[2018\]](#) consider the case that different agents have different mean rewards, and each agent has a different unique action it should choose to maximize the total regret. They showed an average regret of order  $O\left(\log^{2+\epsilon} T\right)$  for every  $\epsilon > 0$ , where the  $O$ -notation hides the dependency on the mean rewards.

## 2 Preliminaries

We consider a nonstochastic multi-armed bandit problem over a finite action set  $A = \{1, \dots, K\}$  played by  $N$  agents. Let  $G = \langle V, E \rangle$  be an undirected connected communication graph for the set of agents  $V = \{1, \dots, N\}$ , and denote by  $\mathcal{N}(v)$  the neighborhood of  $v \in V$ , including itself. Namely,

$$\mathcal{N}(v) = \{u \in V \mid \langle u, v \rangle \in E\} \cup \{v\}.$$

At each time step  $t = 1, 2, \dots, T$ , each agent  $v \in V$  draws an action  $I_t(v) \in A$  from a distribution  $\mathbf{p}_t^v = \langle p_t^v(1), \dots, p_t^v(K) \rangle$  on  $A$ . It then suffers a loss  $\ell_t(I_t(v)) \in [0, 1]$  which it observes. Notice the loss does not depend on the agent, but only on the time step and the chosen action. Thus, agents that pick the same action at the same step will suffer the same loss. We also assume the adversary is oblivious, i.e., the losses do not depend on the agents' realized actions. In the end of step  $t$ , each agent sends a message

$$m_t(v) = \langle v, t, I_t(v), \ell_t(I_t(v)), \mathbf{p}_t^v \rangle$$

to all the agents in its neighborhood, and also receives messages from its neighbors:  $m_t(v')$  for all  $v' \in \mathcal{N}(v)$ . Our goal is to minimize, for each  $v \in V$ , its *expected regret* over  $T$  steps:

$$R_T(v) = \mathbb{E} \left[ \sum_{t=1}^T \ell_t(I_t(v)) - \min_{i \in A} \sum_{t=1}^T \ell_t(i) \right].$$

A well-known policy to update  $\mathbf{p}_t^v$  is the exponential-weights algorithm (Exp3) with weights  $w_t^v(i)$  for all  $i \in A$ , such that  $p_t^v(i) = \frac{w_t^v(i)}{W_t^v}$  where  $W_t^v = \sum_{i \in A} w_t^v(i)$  (see, e.g., [\[Cesa-Bianchi and Lugosi, 2006\]](#)). The weights are updated as follows: let  $B_t^v(i)$  be the event that  $v$  observed the loss of action  $i$  at step  $t$ ; in our case  $B_t^v(i) = \mathbb{I} \{ \exists v' \in \mathcal{N}(v) : I_t(v') = i \}$ , where  $\mathbb{I}$  is the indicator function. Also, let  $\hat{\ell}_t^v(i) = \frac{\ell_t(i)}{\mathbb{E}_t[B_t^v(i)]} B_t^v(i)$  be an unbiased estimated loss of action  $i$  at step  $t$ , where  $\mathbb{E}_t[\cdot]$  is the expectation conditioned on all the agents' choices up to step  $t$  (hence,  $\mathbb{E}_t[\hat{\ell}_t^v(i)] = \ell_t(i)$ ). Then

$$w_{t+1}^v(i) = w_t^v(i) \exp\left(-\eta(v) \hat{\ell}_t^v(i)\right),$$

where  $\eta(v)$  is a positive parameter chosen by  $v$ , called the *learning rate* of agent  $v$ . Exp3 is given explicitly in the supplementary material. Notice that in our setting all agents  $v \in V$  have the information needed to compute  $\hat{\ell}_t^v(i)$ , since

$$\mathbb{E}_t[B_t^v(i)] = \Pr[\exists v' \in \mathcal{N}(v) : I_t(v') = i] = 1 - \prod_{v' \in \mathcal{N}(v)} (1 - p_t^{v'}(i)),$$

and if agent  $v$  does not observe  $\ell_t(i)$ , then  $\hat{\ell}_t^v(i) = 0$ .

We proceed with two useful lemmas that will help us later. For completeness, we provide their proofs in the supplementary material as well. The first lemma is the usual analysis of the exponential-weights algorithm:

**Lemma 1.** Assuming agent  $v$  uses the exponential-weights algorithm, its expected regret satisfies

$$R_T(v) \leq \frac{\ln K}{\eta(v)} + \frac{\eta(v)}{2} \mathbb{E} \left[ \sum_{t=1}^T \sum_{i=1}^K p_t^v(i) \hat{\ell}_t^v(i)^2 \right].$$

The next lemma is from [Cesa-Bianchi et al., 2019b], and it bounds the change of the action distribution in the exponential-weights algorithm.

**Lemma 2.** Assuming agent  $v$  uses the exponential-weights algorithm with a learning rate  $\eta(v) \leq \frac{1}{2K}$ , then for all  $i \in A$ :

$$\left(1 - \eta(v) \hat{\ell}_t^v(i)\right) p_t^v(i) \leq p_{t+1}^v(i) \leq 2p_t^v(i).$$

Also, the following definition will be needed for our algorithm. We denote by  $G^r$  the  $r$ -th power of  $G$ , in which  $v_1, v_2 \in V$  are adjacent if and only if  $\text{dist}_G(v, v') \leq r$ ; and by  $G|_U$  the sub-graph of  $G$  induced by  $U \subseteq V$ .

**Definition 3.** Let  $G = \langle V, E \rangle$  be an undirected connected graph and let  $W \subseteq U \subseteq V$ .  $W$  is called an  $r$ -independent set of  $G$ , if it is an independent set of  $G^r$ . Namely,

$$\forall w, w' \in W : \text{dist}_G(w, w') \geq r + 1.$$

If  $W$  is also a maximal independent set of  $(G^r)|_U$ , it is called a *maximal  $r$ -independent subset* ( $r$ -MIS) of  $U$ . Namely, there is no  $r$ -independent set  $W' \subseteq U$  such that  $W \subset W'$ .

### 3 Center-based cooperative multi-armed bandits

We now present the center-based policy for the cooperative multi-armed bandit setting, which will give us the desired low individual regret. In the center-based cooperative MAB, not all the agents behave similarly. We partition the agents to three different types.

*Center agents* are the agents that determine the action distribution for all other agents. They work together with their neighbors to minimize their regret. The neighbors of the center agents in the communication graph, *center-adjacent* agents, always copy the action distribution from their neighboring center, and thus the centers gain more information about their own distribution each step.

Other (not center or center-adjacent) agents are *simple agents*, which simply copy the action distribution from one of the centers. Since they are not center-adjacent, they receive the action distribution with delay, through other agents that copy from the same center.

We artificially partition the graph to connected components, such that each center  $c$  has its own component, and all the simple agents in the component of  $c$  copy their action distribution from it. To obtain a low individual regret, we require the components to have a relatively small diameter, and the center agents to have a high degree in the communication graph. Namely, center agents have the highest or nearly highest degree in their component.

In more detail, we select a set  $C \subseteq V$  of center agents. All center agents  $c \in C$  use the exponential-weights algorithm with a learning rate  $\eta(c) = \frac{1}{2} \sqrt{\frac{(\ln K) \min\{|\mathcal{N}(c)|, K\}}{KT}}$ . The agent set  $V$  is partitioned into disjoint subsets  $\{V_c \subseteq V \mid c \in C\}$ , such that  $\mathcal{N}(c) \subseteq V_c$  for all  $c \in C$ , and the sub-graph  $G_c \equiv G|_{V_c}$  induced by  $V_c$  is connected. Notice that since the components are disjoint, the condition  $\mathcal{N}(c) \subseteq V_c$  implies  $C$  is a 2-independent set. For all non-centers  $v \in V \setminus C$ , we denote by  $\mathcal{C}(v) \in C$  the center agent such that  $v \in V_{\mathcal{C}(v)}$ , and call it the *center of  $v$* . All non-center agents  $v \in V \setminus C$  copy their distribution from their *origin neighbor*  $U(v)$ , which is their neighbor in  $G_{\mathcal{C}(v)}$  closest to  $\mathcal{C}(v)$ , breaking ties arbitrarily. Namely,

$$U(v) = \arg \min_{v' \in \mathcal{N}(v) \cap V_{\mathcal{C}(v)}} \text{dist}_{G_{\mathcal{C}(v)}}(v', \mathcal{C}(v)).$$

Thus, agent  $v$  receives its center's distribution with a delay of  $d(v) = \text{dist}_{G_{\mathcal{C}(v)}}(v, \mathcal{C}(v))$  steps, so for all  $t \geq d(v) + 1$ :

$$\mathbf{p}_t^v = \mathbf{p}_{t-d(v)}^{\mathcal{C}(v)}.$$

Notice that if  $v \in \mathcal{N}(c)$ , then  $v$  is center-adjacent and it holds  $U(v) = \mathcal{C}(v)$  and  $d(v) = 1$ . For completeness, we define  $U(c) = \mathcal{C}(c) = c$  and  $d(c) = 0$  for all  $c \in C$ .

To express the regret of the center-based policy, we introduce a new concept:

---

**Algorithm 1** Center-based cooperative MAB -  $v$  is a center agent

---

**Parameters:** Number of arms  $K$ ; Time horizon  $T$ .

**Initialize:**  $\eta(v) \leftarrow \frac{1}{2} \sqrt{\frac{(\ln K)M(v)}{KT}}$ ;  $w_1^v(i) \leftarrow \frac{1}{K}$  for all  $i \in A$ .

1: **for**  $t \leq T$  **do**

2:   Set  $p_t^v(i) \leftarrow \frac{w_t^v(i)}{W_t^v}$  for all  $i \in A$ , where  $W_t^v = \sum_{i \in A} w_t^v(i)$ .

3:   Play an action  $I_t(v)$  drawn from  $\mathbf{p}_t^v = \langle p_t^v(1), \dots, p_t^v(K) \rangle$ .

4:   Observe loss  $\ell_t(I_t(v))$ .

5:   Send the following message to the set  $\mathcal{N}(v)$ :  $m_t(v) = \langle v, t, I_t(v), \ell_t(I_t(v)), \mathbf{p}_t^v \rangle$ .

6:   Receive all messages  $m_t(v')$  from  $v' \in \mathcal{N}(v)$ .

7:   Update for all  $i \in A$ :  $w_{t+1}^v(i) \leftarrow w_t^v(i) \exp\left(-\eta(v) \hat{\ell}_t^v(i)\right)$ , where

$$\hat{\ell}_t^v(i) = \frac{\ell_t(i)}{\mathbb{E}_t[B_t^v(i)]} B_t^v(i),$$

$$B_t^v(i) = \mathbb{I}\{\exists v' \in \mathcal{N}(v) : I_t(v') = i\}, \quad \mathbb{E}_t[B_t^v(i)] = 1 - \prod_{v' \in \mathcal{N}(v)} (1 - p_t^{v'}(i)).$$

8: **end for**

---

---

**Algorithm 2** Center-based cooperative MAB -  $v$  is a non-center agent

---

**Parameters:** Number of arms  $K$ ; Time horizon  $T$ ; Origin neighbor  $U(v)$ .

**Initialize:**  $p_1^v(i) \leftarrow \frac{1}{K}$  for all  $i \in A$ .

1: **for**  $t \leq T$  **do**

2:   Play an action  $I_t(v)$  drawn from  $\mathbf{p}_t^v = \langle p_t^v(1), \dots, p_t^v(K) \rangle$ .

3:   Observe loss  $\ell_t(I_t(v))$ .

4:   Send the following message to the set  $\mathcal{N}(v)$ :  $m_t(v) = \langle v, t, I_t(v), \ell_t(I_t(v)), \mathbf{p}_t^v \rangle$ .

5:   Receive the message  $m_t(U(v))$  from  $U(v)$ .

6:   Update  $p_{t+1}^v(i) = p_t^{U(v)}(i)$  for all  $i \in A$ .

7: **end for**

---

**Definition 4.** The *mass* of a center agent  $c \in C$  is defined to be

$$M(c) \equiv \min\{|\mathcal{N}(c)|, K\},$$

and the mass of non-center agent  $v \in V \setminus C$  is

$$M(v) \equiv e^{-\frac{1}{6}d(v)} M(C(v)).$$

Notice the mass depends only on how the graph is partitioned, and it satisfies  $M(v) = e^{-\frac{1}{6}} M(U(v))$  for all non-centers  $v \in V \setminus C$ . Intuitively, the mass of agent  $v$  captures the idea that as the degree of the center is larger and as the agent is closer to its center, the lower the regret of  $v$ . We prove that the regret is  $\tilde{O}\left(\sqrt{\frac{K}{M(v)}T}\right)$ . Our partitioning algorithms, presented in the next section, show that the mass of agent  $v$  satisfies  $M(v) = \Omega(\min\{|\mathcal{N}(v)|, K\})$ , so we obtain an individual regret of the order of  $\tilde{O}\left(\sqrt{\left(1 + \frac{K}{|\mathcal{N}(v)|}\right)T}\right)$ .

We specify the center-based policy in Algorithms 1 and 2. We emphasize that before the agents use the center-based policy they must partition the graph with one of the algorithms we present in the next section. While the agents partition the graph, they play arbitrary actions.

## 4 Partitioning the graph

The goal now is to show that we can partition the graph such that the mass is large for every  $v \in V$ . In particular, we want to show that any graph can be partitioned such that  $M(v) = \Omega(\min\{|\mathcal{N}(v)|, K\})$ .

We consider two cases: the informed and uninformed settings. In the informed setting, all of the agents have access to the graph structure. Each agent can partition the graph by itself in advance,

---

**Algorithm 3** Centers-to-Components

---

**Parameters:** Number of arms  $K$ ; Center set  $C$ .

**Initialize:** Number of iterations  $\Theta_K \leftarrow \lfloor 12 \ln K \rfloor$ .

```
1: if  $v \in C$  then
2:   Initialize:  $\mathcal{C}_0(v) \leftarrow v$ ;  $U_0(v) \leftarrow v$ ;  $M_0(v) \leftarrow \min\{|\mathcal{N}(v)|, K\}$ .
3: else
4:   Initialize:  $\mathcal{C}_0(v) \leftarrow \text{nil}$ ;  $U_0(v) \leftarrow \text{nil}$ ;  $M_0(v) \leftarrow 0$ .
5: end if
6: for  $0 \leq t \leq \Theta_K$  do
7:   Send the following message to the set  $\mathcal{N}(v)$ :  $\mu_t(v) = \langle v, t, \mathcal{C}_t(v), M_t(v) \rangle$ .
8:   Receive all messages  $\mu_t(v')$  from  $v' \in \mathcal{N}(v)$ .
9:   if  $U_t(v) \notin C$  then ▷ The center-based policy requires  $\mathcal{N}(c) \subseteq V_c$  for all  $c \in C$ .
10:    Find the best origin neighbor for  $v$ :
```

$$U_{t+1}(v) \leftarrow \arg \max_{v' \in \mathcal{N}(v) \setminus \{v\}} M_t(v').$$

```
11:   Update:  $\mathcal{C}_{t+1}(v) \leftarrow \mathcal{C}_t(U_{t+1}(v))$ ;  $M_{t+1}(v) \leftarrow e^{-\frac{1}{6}} M_t(U_{t+1}(v))$ .
12:   else
13:     Keep old values:  $\mathcal{C}_{t+1}(v) \leftarrow \mathcal{C}_t(v)$ ;  $U_{t+1}(v) \leftarrow U_t(v)$ ;  $M_{t+1}(v) \leftarrow M_t(v)$ .
14:   end if
15: end for
16: return
```

$$\mathcal{C}(v) = \mathcal{C}_{\Theta_K+1}(v); \quad U(v) = U_{\Theta_K+1}(v); \quad M(v) = M_{\Theta_K+1}(v).$$

---

to know the role it plays: whether it is a center or not, and which agent is its origin neighbor. In the uninformed setting, the graph structure is not known to the agents, only their neighbors and an upper bound on the total number of agents  $\bar{N} \geq N$ . The agents partition the graph using a distributed algorithm while playing actions and suffering loss.

The basic structure of the partitioning algorithm in both settings is the same. First, we show an algorithm that computes the connected components given a center set  $C$ . Then, we show an algorithm that computes a center set  $C$ . The second algorithm is specifically designed to be used with the first, and together they partition the graph to connected components such that every agent has a large mass.

#### 4.1 Computing graph components given a center set

Given a center set  $C$ , we show a distributed algorithm called *Centers-to-Components*, which computes the connected components, and present it in Algorithm 3. Although it is distributed, in the informed setting agents can simply simulate it locally in advance.

Centers-to-Components runs simultaneous distributed BFS graph traversals, originating from every center  $c \in C$ . When the traversal of center  $c$  arrives to a simple agent  $v \in V \setminus C$ ,  $v$  decides if  $c$  is the best center for it so far, and if it is,  $v$  switches its component to  $V_c$ . Notice each agent needs to know only if itself is a center or not.

#### 4.2 Computing centers

To compute the center set  $C$ , we show two algorithms; one for the informed setting and one for the uninformed setting. The regret bound for the informed setting is slightly better, and the algorithm is simpler.

**The informed setting** The algorithm that computes the center set in the informed setting is called *Compute-Centers-Informed* and is presented in Algorithm 4. The center set is built in a greedy way: each iteration, all of the agents test if they are “satisfied” with the current center set (i.e.,  $M(v) \geq \min\{|\mathcal{N}(v)|, K\}$ ). If there are unsatisfied agents left, the agent with the highest degree is added to the center set.



---

**Algorithm 4** Compute-Centers-Informed

---

**Parameters:** Undirected connected graph  $G = \langle V, E \rangle$ ; Number of arms  $K$ .

**Initialize:** Center set  $C_0 \leftarrow \emptyset$ ; Unsatisfied agents  $S_0 \leftarrow V$ .

- 1:  $t \leftarrow 0$ .
- 2: **while**  $S_t \neq \emptyset$  **do**
- 3:   Choose the next center:  $c_t \leftarrow \arg \max_{v \in S_t} |\mathcal{N}(v)|$ .
- 4:   Update  $C_{t+1} \leftarrow C_t \cup \{c_t\}$ .
- 5:   Run Centers-to-Components with center set  $C_{t+1}$ , and obtain mass  $M_{t+1}(v)$  for each  $v \in V$ .
- 6:   Update

$$S_{t+1} \leftarrow \left\{ v \in V \mid M_{t+1}(v) < \min \{ |\mathcal{N}(v)|, K \} \wedge \min_{c \in C_{t+1}} \text{dist}_G(v, c) \geq 3 \right\}.$$

- 7:    $t \leftarrow t + 1$ .
  - 8: **end while**
  - 9: **return**  $C = C_t$ .
- 

**The uninformed setting** At first, it may seem that the uninformed setting can be solved the same way as the informed setting, with some distributed version of Compute-Centers-Informed. However, such algorithm will require  $\Omega(N)$  steps in the worst case, since at each iteration only one agent becomes a center. In the informed setting we do not care about this, since the components are computed in advance. In the uninformed setting however, at each step of the algorithm the agents suffer a loss, and thus the regret bound will be at least linear in the number of agents, which can be very large.

To avoid this problem, we need to add many centers each iteration, and not just one as in Compute-Centers-Informed. To do this, we exploit the fact that there are only  $K$  possible values for a center's mass. In our algorithm, there are  $K$  iterations, and in each iteration  $t$ , as many agents as possible with degree  $K - t$  become centers. To ensure the final center set is 2-independent, only a 2-MIS of the potential center agents are added to the center set each iteration.

To compute a 2-MIS in a distributed manner, we use Luby's algorithm [Luby, 1986, Alon et al., 1986] on the sub-graph of  $G^2$  induced by the potential center agents. Briefly, at each iteration of Luby's algorithm, every potential center agent picks a number uniformly from  $[0, 1]$ . Agents that picked the maximal number among their neighbors of distance 2 join the 2-MIS, and their neighbors of distance 2 stop participating. A 2-MIS is computed after  $\left\lceil 3 \ln \left( \frac{N}{\sqrt{\delta}} \right) \right\rceil$  iterations with probability  $1 - \delta$ . Each iteration requires exchanging 4 messages - 2 for communicating the random numbers and 2 for communicating the new agents in the 2-MIS. Hence,  $4 \left\lceil 3 \ln \left( \frac{N}{\sqrt{\delta}} \right) \right\rceil$  steps suffice to compute a 2-MIS with probability  $1 - \delta$ . A more detailed explanation of Luby's algorithm can be found in the supplementary material.

We present *Compute-Centers-Uninformed* in Algorithm 5. Since this is a distributed algorithm, we have the variables  $\mathbb{C}(v)$  and  $\mathbb{S}(v)$  as indicators for whether  $v$  is a center or unsatisfied, respectively.

## 5 Regret analysis

We will now provide an overview for the analysis of our algorithms. We remind that all proofs are differed to the supplementary material.

### 5.1 Individual regret of the center-based policy

We start by bounding the expected regret of the agents when they are using the center-based policy.

**Theorem 5.** *Let  $T \geq K^2 \ln K$ . Using the center-based policy, the regret of each agent  $v \in V$  satisfies*

$$R_T(v) \leq 7 \sqrt{(\ln K) \frac{K}{M(v)} T}.$$

---

**Algorithm 5** Compute-Centers-Uninformed - agent  $v$ 

---

**Parameters:** Number of arms  $K$ ; Upper bound on the total number of agents  $\bar{N}$ ; Time horizon  $T$ .

**Initialize:** Center indicator  $\mathbb{C}(v) \leftarrow \text{FALSE}$ ; Unsatisfied indicator  $\mathbb{S}(v) \leftarrow \text{TRUE}$ .

1: **for**  $0 \leq t \leq K-1$  **do**

2:   Participate for  $4 \left\lceil 3 \ln \left( \bar{N} \sqrt{KT} \right) \right\rceil$  steps in Luby's algorithm on  $(G^2)_{|S_t}$ , where

$$S_t = \{v \in V \mid \mathbb{S}(v) = \text{TRUE} \wedge \min \{|\mathcal{N}(v)|, K\} = K - t\},$$

to compute  $W_t$ , a 2-MIS of  $S_t$ , with probability  $1 - \frac{1}{TK}$ .

3:   If  $v \in W_t$ , set  $\mathbb{C}(v) \leftarrow \text{TRUE}$ .

4:   Participate in Centers-to-Components with center set  $C_t = \{v' \in V \mid \mathbb{C}(v') = \text{TRUE}\}$ ; obtain mass  $M_t(v)$  and whether  $\min_{c \in C_t} \text{dist}_G(v, c) \geq 3$ .

5:    $\triangleright \min_{c \in C_t} \text{dist}_G(v, c) \geq 3$  if and only if  $\mathcal{C}_2(v) = \text{nil}$  in Centers-to-Components.

6:   Update

$$\mathbb{S}(v) \leftarrow \mathbb{I} \left[ M_t(v) < \min \{|\mathcal{N}(v)|, K\} \wedge \min_{c \in C_t} \text{dist}_G(v, c) \geq 3 \right].$$

7: **end for**

8: **return**  $C = C_{K-1}$ .

---

This individual regret bound holds simultaneously for all agents in the graph, and it depends only on the graph structure and components.

## 5.2 Analyzing Centers-to-Components

We need to show the results of Centers-to-Components follow their definitions, and the derived components satisfy all the properties required by the center-based policy. The following lemma show it under some requirements from the center set  $C$ .

**Lemma 6.** *Let  $C \subseteq V$  be a center set that is 2-independent, such that every  $v \in V$  holds  $\min_{c \in C} \text{dist}_G(v, c) \leq 6 \ln K - 1$ . Let  $\mathcal{C}(v), U(v), M(v)$  be the results of Centers-to-Components. For each  $c \in C$ , let  $V_c$  be its corresponding component, namely,  $V_c = \{v \in V \mid \mathcal{C}(v) = c\}$ . Then the following properties are satisfied:*

1.  $\{V_c \mid c \in C\}$  are pairwise disjoint and  $V = \bigcup_{c \in C} V_c$ .
2.  $\mathcal{N}(c) \subseteq V_c$  and  $G_c$  is connected for all  $c \in C$ .
3.  $M(v) = e^{-\frac{1}{6}d(v)} M(\mathcal{C}(v))$  and  $U(v) = \arg \min_{v' \in \mathcal{N}(v) \cap V_{\mathcal{C}(v)}} d(v')$  for all  $v \in V \setminus C$ .

## 5.3 Analyzing Compute-Centers-Informed

The first thing we need to show is that the center set returned by Compute-Centers-Informed satisfies the conditions of Lemma 6:

**Lemma 7.** *Let  $C \subseteq V$  be the center set returned by Compute-Centers-Informed. Then:*

1.  $C$  is 2-independent.
2. For all  $v \in V$ ,  $\min_{c \in C} \text{dist}_G(v, c) \leq 6 \ln K - 1$ .

Now, we can show that by using our informed graph partitioning algorithms, the mass of all agents is large:

**Theorem 8.** *Let  $C \subseteq V$  be the center set returned by Compute-Centers-Informed, and let  $\{V_c \subseteq V \mid c \in C\}$  be the components resulted from Centers-to-Components. For every  $v \in V$ :*

$$M(v) \geq e^{-1} \min \{|\mathcal{N}(v)|, K\}.$$

Together with Theorem 5, we obtain the desired regret bound.



**Corollary 9.** Let  $T \geq K^2 \ln K$ . Let  $C \subseteq V$  be the center set returned by Compute-Centers-Informed, and let  $\{V_c \subseteq V \mid c \in C\}$  be the components resulted from Centers-to-Components. Using the center-based policy, we obtain for every  $v \in V$ :

$$R_T(v) \leq 12 \sqrt{(\ln K) \left(1 + \frac{K}{|\mathcal{N}(v)|}\right) T} = \tilde{O} \left( \sqrt{\left(1 + \frac{K}{|\mathcal{N}(v)|}\right) T} \right).$$

#### 5.4 Analyzing Compute-Centers-Uninformed

First, we show that Compute-Centers-Uninformed terminates after a relatively small number of steps, and thus the loss suffered while running it is insignificant.

**Lemma 10.** Compute-Centers-Uninformed runs for less than  $12K \ln(K^2 \bar{N} T)$  steps.

As in the informed setting, we now need to show the center set resulted from Compute-Centers-Uninformed satisfies the conditions of Lemma 6.

**Lemma 11.** Let  $C \subseteq V$  be the center set resulted from Compute-Centers-Uninformed, such that Luby's algorithm succeeded at all iterations of the algorithm. Then:

1.  $C$  is 2-independent.
2. For all  $v \in V$ ,  $\min_{c \in C} \text{dist}_G(v, c) \leq 6 \ln K - 1$ .

We can now obtain the same result as in the informed setting:

**Theorem 12.** Let  $C \subseteq V$  be the center set resulted from Compute-Centers-Uninformed, such that Luby's algorithm succeeded at all iterations of the algorithm, and also let  $\{V_c \subseteq V \mid c \in C\}$  be the components resulted from Centers-to-Components. For every  $v \in V$ :

$$M(v) \geq e^{-1} \min\{|\mathcal{N}(v)|, K\}.$$

Again we can use Theorem 5 to obtain the desired regret bound.

**Corollary 13.** Let  $T \geq K^2 \ln K$  and  $\bar{N} \geq N$ . Let  $C \subseteq V$  be the center set resulted from Compute-Centers-Uninformed, and let  $\{V_c \subseteq V \mid c \in C\}$  be the components resulted from Centers-to-Components. Using the center-based policy, we obtain for every  $v \in V$ :

$$R_T(v) \leq 12 \left( K \ln(K^2 \bar{N} T) + \sqrt{(\ln K) \left(1 + \frac{K}{|\mathcal{N}(v)|}\right) T} \right) + 1 = \tilde{O} \left( \sqrt{\left(1 + \frac{K}{|\mathcal{N}(v)|}\right) T} \right).$$

#### 5.5 Average regret of the center-based policy

As mentioned before, we strictly improve the result of Cesa-Bianchi et al. [2019b], and our algorithms imply the same average expected regret bound.

**Corollary 14.** Let  $T \geq K^2 \ln K$ . Let  $C \subseteq V$  be the center set resulted from Compute-Centers-Informed or Compute-Centers-Uninformed, and let  $\{V_c \subseteq V \mid c \in C\}$  be the components resulted from Centers-to-Components. Using the center-based policy, we get:

$$\frac{1}{N} \sum_{v \in V} R_T(v) = \tilde{O} \left( \sqrt{\left(1 + \frac{K}{N} \alpha(G)\right) T} \right).$$

## 6 Conclusions

We investigated the cooperative nonstochastic multi-armed bandit problem, and presented the center-based cooperation policy (Algorithms 1 and 2). We provided partitioning algorithms that provably yield a low individual regret bound that holds simultaneously for all agents (Algorithms 3, 4 and 5). We express this bound in terms of the agents' degree in the communication graph. This bound strictly improves a previous regret bound from [Cesa-Bianchi et al., 2019b] (Corollary 14), and also resolves an open question from that paper.

Note that our regret bound in the informed setting does not depend on the total number of agents,  $N$ , and in the uninformed setting it depends on  $\bar{N}$  only logarithmically. It is unclear whether in the uninformed setting, any dependence on  $N$  in the individual regret is required.

## Acknowledgments

This work was supported in part by the Yandex Initiative in Machine Learning and by a grant from the Israel Science Foundation (ISF).

## References

- Noga Alon, László Babai, and Alon Itai. A fast and simple randomized parallel algorithm for the maximal independent set problem. *Journal of algorithms*, 7(4):567–583, 1986.
- Peter Auer, Nicolo Cesa-Bianchi, Yoav Freund, and Robert E Schapire. The nonstochastic multiarmed bandit problem. *SIAM journal on computing*, 32(1):48–77, 2002.
- Orly Avner and Shie Mannor. Concurrent bandits and cognitive radio networks. In *Joint European Conference on Machine Learning and Knowledge Discovery in Databases*, pages 66–81. Springer, 2014.
- Baruch Awerbuch and Robert Kleinberg. Competitive collaborative learning. *Journal of Computer and System Sciences*, 74(8):1271–1288, 2008.
- Ilai Bistritz and Amir Leshem. Distributed multi-player bandits-a game of thrones approach. In *Advances in Neural Information Processing Systems*, pages 7222–7232, 2018.
- Sébastien Bubeck, Nicolo Cesa-Bianchi, et al. Regret analysis of stochastic and nonstochastic multi-armed bandit problems. *Foundations and Trends® in Machine Learning*, 5(1):1–122, 2012.
- Nicolo Cesa-Bianchi and Gabor Lugosi. *Prediction, learning, and games*. Cambridge university press, 2006.
- Nicolò Cesa-Bianchi, Tommaso R Cesari, and Claire Monteleoni. Cooperative online learning: Keeping your neighbors updated. *arXiv preprint arXiv:1901.08082*, 2019a.
- Nicolo Cesa-Bianchi, Claudio Gentile, and Yishay Mansour. Delay and cooperation in nonstochastic bandits. *The Journal of Machine Learning Research*, 20(1):613–650, 2019b.
- Soumya Kar, H Vincent Poor, and Shuguang Cui. Bandit problems in networks: Asymptotically efficient distributed allocation rules. In *2011 50th IEEE Conference on Decision and Control and European Control Conference*, pages 1771–1778. IEEE, 2011.
- Ravi Kumar Kolla, Krishna Jagannathan, and Aditya Gopalan. Collaborative learning of stochastic bandits over a social network. *IEEE/ACM Transactions on Networking (TON)*, 26(4):1782–1795, 2018.
- Peter Landgren, Vaibhav Srivastava, and Naomi Ehrich Leonard. On distributed cooperative decision-making in multiarmed bandits. In *2016 European Control Conference (ECC)*, pages 243–248. IEEE, 2016a.
- Peter Landgren, Vaibhav Srivastava, and Naomi Ehrich Leonard. Distributed cooperative decision-making in multiarmed bandits: Frequentist and bayesian algorithms. In *2016 IEEE 55th Conference on Decision and Control (CDC)*, pages 167–172. IEEE, 2016b.
- Michael Luby. A simple parallel algorithm for the maximal independent set problem. *SIAM journal on computing*, 15(4):1036–1053, 1986.
- Jonathan Rosenski, Ohad Shamir, and Liran Szlak. Multi-player bandits—a musical chairs approach. In *International Conference on Machine Learning*, pages 155–163, 2016.
- Anit Kumar Sahu and Soumya Kar. Dist-hedge: A partial information setting based distributed non-stochastic sequence prediction algorithm. In *2017 IEEE Global Conference on Signal and Information Processing (GlobalSIP)*, pages 528–532. IEEE, 2017.
- Yevgeny Seldin, Peter L Bartlett, Koby Crammer, and Yasin Abbasi-Yadkori. Prediction with limited advice and multiarmed bandits with paid observations. In *ICML*, pages 280–287, 2014.

- Balázs Szörényi, Róbert Busa-Fekete, István Hegedűs, Róbert Ormándi, Márk Jelasity, and Balázs Kégl. Gossip-based distributed stochastic bandit algorithms. In *Journal of Machine Learning Research Workshop and Conference Proceedings*, volume 2, pages 1056–1064. International Machine Learning Society, 2013.
- VK Wei. A lower bound on the stability number of a simple graph. Technical report, Bell Laboratories Technical Memorandum 81-11217-9, Murray Hill, NJ, 1981.

# Supplementary Material

## A Proofs from Subsection 5.1

We first bound the regret of the center agents:

**Lemma 15.** *Let  $T \geq K^2 \ln K$ . Using the center-based policy, the expected regret of each center  $c \in C$  satisfies*

$$R_T(c) \leq 4\sqrt{(\ln K) \frac{K}{M(c)} T}.$$

*Proof.* Since  $T \geq K^2 \ln K$ , we have  $\eta(c) = \frac{1}{2}\sqrt{\frac{(\ln K)M(c)}{KT}} \leq \frac{1}{2}\sqrt{\frac{M(c)}{K^3}} \leq \frac{1}{2K}$ . Hence, from Lemma 2, we get for any  $v \in \mathcal{N}(c) \setminus c$  and  $i \in A$ :

$$p_t^v(i) = p_{t-1}^c(i) \geq \frac{1}{2}p_t^c(i).$$

Hence,

$$\begin{aligned} \mathbb{E}_t[B_t^c(i)] &= 1 - \prod_{v \in \mathcal{N}(c)} (1 - p_t^v(i)) \\ &\geq 1 - \left(1 - \frac{1}{2}p_t^c(i)\right)^{|\mathcal{N}(c)|} \\ &\geq 1 - \exp\left(-\frac{1}{2}p_t^c(i)|\mathcal{N}(c)|\right) \quad (1 - x \leq e^{-x}) \\ &\geq 1 - \exp\left(-\min\left\{\frac{1}{2}|\mathcal{N}(c)|p_t^c(i), 1\right\}\right) \\ &\geq (1 - e^{-1}) \min\left\{\frac{1}{2}|\mathcal{N}(c)|p_t^c(i), 1\right\}, \quad ((1 - e^{-1})x \leq 1 - e^{-x} \text{ for } 0 \leq x \leq 1) \end{aligned}$$

and thus,

$$\begin{aligned} \mathbb{E}_t[\hat{\ell}_t^c(i)^2] &= \mathbb{E}_t\left[\frac{\ell_t(i)^2}{\mathbb{E}_t[B_t^c(i)]^2} B_t^c(i)\right] \\ &\leq \frac{1}{\mathbb{E}_t[B_t^c(i)]} \quad (\ell_t(i) \leq 1) \\ &\leq \frac{1}{(1 - e^{-1}) \min\left\{\frac{1}{2}|\mathcal{N}(c)|p_t^c(i), 1\right\}} \\ &\leq 2 + \frac{4}{|\mathcal{N}(c)|p_t^c(i)}. \end{aligned}$$

By Lemma 1, we now obtain

$$\begin{aligned} R_T(c) &\leq \frac{\ln K}{\eta(c)} + \frac{\eta(c)}{2} \mathbb{E}\left[\sum_{t=1}^T \sum_{i=1}^K p_t^c(i) \mathbb{E}_t[\hat{\ell}_t^c(i)^2]\right] \\ &\leq \frac{\ln K}{\eta(c)} + \frac{\eta(c)}{2} \left(2 + 4\frac{K}{|\mathcal{N}(c)|}\right) T \\ &\leq \frac{\ln K}{\eta(c)} + 4\eta(c) \frac{K}{M(c)} T \\ &= 4\sqrt{(\ln K) \frac{K}{M(c)} T} \quad (\eta(c) = \frac{1}{2}\sqrt{\frac{(\ln K)M(c)}{KT}}) \end{aligned}$$

as claimed.  $\square$

Since non-center agents use the same distribution as some center, only with delay, we can use this result together with Lemma 2 to bound the regret of all agents in the graph.

### Proof of Theorem 5

**Theorem 5.** *Let  $T \geq K^2 \ln K$ . Using the center-based policy, the regret of each agent  $v \in V$  satisfies*

$$R_T(v) \leq 7 \sqrt{(\ln K) \frac{K}{M(v)} T}.$$

*Proof.* Again, since  $T \geq K^2 \ln K$  we have  $\eta(v) \leq \frac{1}{2K}$ . Recall that  $\mathbf{p}_t^v = \mathbf{p}_{t-d(v)}^{\mathcal{C}(v)}$ . Thus, we can use Lemma 2 iteratively to obtain for all  $t > d(v)$ :

$$\begin{aligned} p_t^v(i) &= p_{t-d(v)}^{\mathcal{C}(v)}(i) \\ &\leq p_{t-d(v)+1}^{\mathcal{C}(v)}(i) + \eta(\mathcal{C}(v)) p_{t-d(v)}^{\mathcal{C}(v)}(i) \hat{\ell}_{t-d(v)}^{\mathcal{C}(v)}(i) \\ &\leq \dots \leq p_t^{\mathcal{C}(v)}(i) + \eta(\mathcal{C}(v)) \sum_{s=1}^{d(v)} p_{t-s}^{\mathcal{C}(v)}(i) \hat{\ell}_{t-s}^{\mathcal{C}(v)}(i), \end{aligned}$$

which yields

$$\begin{aligned} R_T(v) &= \mathbb{E} \left[ \sum_{t=1}^T \ell_t(I_t(v)) - \min_{i \in A} \sum_{t=1}^T \ell_t(i) \right] \\ &= \mathbb{E} \left[ \sum_{t=1}^T \sum_{i=1}^K p_t^v(i) \ell_t(i) - \min_{i \in A} \sum_{t=1}^T \ell_t(i) \right] \\ &\leq d(v) + \mathbb{E} \left[ \sum_{t=d(v)}^T \sum_{i=1}^K p_t^{\mathcal{C}(v)}(i) \ell_t(i) - \min_{i \in A} \sum_{t=d(v)}^T \ell_t(i) \right] \\ &\quad + \eta(\mathcal{C}(v)) \mathbb{E} \left[ \sum_{t=d(v)}^T \sum_{i=1}^K \sum_{s=1}^{d(v)} p_{t-s}^{\mathcal{C}(v)}(i) \hat{\ell}_{t-s}^{\mathcal{C}(v)}(i) \ell_t(i) \right] \\ &\leq R_T(\mathcal{C}(v)) + d(v) + d(v) \eta(\mathcal{C}(v)) T, \end{aligned}$$

where the last inequality is implied from

$$\mathbb{E}_{t-s} \left[ \sum_{i=1}^K p_{t-s}^{\mathcal{C}(v)}(i) \hat{\ell}_{t-s}^{\mathcal{C}(v)}(i) \ell_t(i) \right] \leq \sum_{i=1}^K p_{t-s}^{\mathcal{C}(v)}(i) \ell_{t-s}(i) \leq 1.$$

Hence, using Lemma 15 we get

$$\begin{aligned} R_T(v) &\leq \left( 4 \sqrt{\frac{K}{M(\mathcal{C}(v))}} + d(v) + \frac{d(v)}{2} \sqrt{\frac{M(\mathcal{C}(v))}{K}} \right) \sqrt{(\ln K) T} \\ &\leq \left( 4 \sqrt{\frac{K}{M(\mathcal{C}(v))}} + d(v) \sqrt{\frac{M(\mathcal{C}(v))}{K}} \right) \sqrt{(\ln K) T} \\ &\leq 7 \sqrt{(\ln K) \frac{K}{M(v)} T}, \end{aligned}$$

concluding our proof.  $\square$

## B Proofs from Subsection 5.2

We first show two helpful lemmas that analyze the results of Centers-to-Components. In the following, we denote  $\Theta_K = \lfloor 12 \ln K \rfloor$  and  $\tau^v = \min_{c \in C} \text{dist}_G(v, c)$  for any  $v \in V$ .

**Lemma 16.** Let  $\mathcal{C}_t(v), U_t(v), M_t(v)$  be the variables of agent  $v$  at iteration  $t$  from *Centers-to-Components*. Then the following properties hold for all  $1 \leq t \leq \Theta_K + 1$  and  $v \in V \setminus C$ :

1.  $M_t(v) \geq M_{t-1}(v)$ .
2. If  $M_t(v) \neq M_{t-1}(v)$ , then  $\mathcal{C}_t(v) \neq \text{nil}$  and
$$M_t(v) = e^{-\frac{1}{6}t} M(\mathcal{C}_t(v)).$$

Moreover,  $t \geq \text{dist}_G(v, \mathcal{C}_t(v))$ .
3. If  $\tau^v \leq \Theta_K + 1$ , then  $M_{\tau^v}(v) \geq e^{-\frac{1}{6}\tau^v}$ .
4. If  $\tau^v \leq 6 \ln K$ , then  $\mathcal{C}_{\Theta_K+1}(v) = \mathcal{C}_{\Theta_K}(v), M_{\Theta_K+1}(v) = M_{\Theta_K}(v)$ .

*Proof.*

1. For center-adjacent agents this is immediate from the algorithm. Otherwise, let  $v$  be a simple agent. We proceed by induction over  $t$ . If  $t = 1$ , we have  $M_t(v) = M_1(v) = M_0(v) = 0$ . Assume for all  $t > 1$  and  $v' \in V \setminus C$  that  $M_{t-1}(v') \geq M_{t-2}(v')$ . Since we choose  $U_t(v)$  to be the neighbor with maximal mass at iteration  $t - 1$ , for any  $t > 1$  we get

$$\begin{aligned} M_t(v) &= e^{-\frac{1}{6}} M_{t-1}(U_t(v)) \\ &\geq e^{-\frac{1}{6}} M_{t-1}(U_{t-1}(v)) \\ &\geq e^{-\frac{1}{6}} M_{t-2}(U_{t-1}(v)) \\ &= M_{t-1}(v) \end{aligned}$$

as desired.

2. Again we proceed by induction on  $t$ . If  $t = 1$  and  $M_t(v) = M_1(v) \neq M_0(v) = 0$ , then  $M_0(U_1(v)) \neq 0$ , and thus  $U_1(v) = \mathcal{C}_1(v) \in C$ . Hence,  $M_t(v) = M_1(v) = e^{-\frac{1}{6}t} M(\mathcal{C}_1(v))$ . For any  $t > 1$ , we assume the property is true for any  $v' \in V \setminus C$  at iteration  $t - 1$ . If  $M_t(v) \neq M_{t-1}(v)$  we obtain from property 1 that  $M_t(v) > M_{t-1}(v)$ , and thus

$$e^{-\frac{1}{6}} M_{t-1}(U_t(v)) > e^{-\frac{1}{6}} M_{t-2}(U_{t-1}(v)).$$

From the way  $U_{t-1}(v)$  is chosen we get

$$M_{t-1}(U_t(v)) > M_{t-2}(U_{t-1}(v)) \geq M_{t-2}(U_t(v)).$$

Hence,  $M_{t-1}(U_t(v)) \neq M_{t-2}(U_t(v))$ , and from our assumption

$$M_t(v) = e^{-\frac{1}{6}} M_{t-1}(U_t(v)) = e^{-\frac{1}{6} - \frac{1}{6}(t-1)} M(\mathcal{C}_{t-1}(U_t(v))) = e^{-\frac{1}{6}t} M(\mathcal{C}_t(v)),$$

where in the last equality we used the fact that  $\mathcal{C}_t(v) = \mathcal{C}_{t-1}(U_t(v))$ . We also get

$$t - 1 \geq \text{dist}_G(U_t(v), \mathcal{C}_{t-1}(U_t(v))) = \text{dist}_G(U_t(v), \mathcal{C}_t(v)).$$

Hence, since  $\text{dist}_G(v, \mathcal{C}_t(v)) \leq \text{dist}_G(U_t(v), \mathcal{C}_t(v)) + 1$ , we obtain  $t \geq \text{dist}_G(v, \mathcal{C}_t(v))$  as desired.

3. We proceed by induction on  $\tau^v$ . If  $\tau^v = \min_{c \in C} \text{dist}_G(v, c) = 1$ , then  $v$  is center-adjacent and thus  $\mathcal{C}_1(v) = \arg \min_{c \in C} \text{dist}_G(v, c)$ , which gives

$$M_{\tau^v}(v) = M_1(v) = e^{-\frac{1}{6}} M(\mathcal{C}_1(v)) \geq e^{-\frac{1}{6}\tau^v}.$$

Otherwise, let  $v \in V \setminus C$  be a simple agent with  $\tau^v > 1$  and  $c = \arg \min_{c' \in C} \text{dist}_G(v, c')$ .

It must have a neighbor  $v' \in \mathcal{N}(v)$  such that  $c = \arg \min_{c' \in C} \text{dist}_G(v', c')$  and  $\tau^{v'} = \text{dist}_G(v', c) = \text{dist}_G(v, c) - 1 = \tau^v - 1$ . We assume the property is true for  $v'$ . From the way the origin neighbor at iteration  $\tau^v$  is chosen we obtain that

$$\begin{aligned} M_{\tau^v}(v) &= e^{-\frac{1}{6}} M_{\tau^v-1}(U_{\tau^v}(v)) \\ &\geq e^{-\frac{1}{6}} M_{\tau^v-1}(v') \\ &= e^{-\frac{1}{6}} M_{\tau^{v'}}(v') \\ &\geq e^{-\frac{1}{6}(1+\tau^{v'})} \\ &= e^{-\frac{1}{6}\tau^v}, \end{aligned}$$

as desired.

4. Assuming to the contrary  $M_{\Theta_K+1}(v) \neq M_{\Theta_K}(v)$  (or  $\mathcal{C}_{\Theta_K+1}(v) \neq \mathcal{C}_{\Theta_K}(v)$ ), we get

$$\begin{aligned}
 M_{\Theta_K+1}(v) &= e^{-\frac{1}{6}(\Theta_K+1)} M(\mathcal{C}_{\Theta_K+1}(v)) && \text{(property 2)} \\
 &< \frac{1}{K} \\
 &\leq e^{-\frac{1}{6}\tau^v} && (\tau^v \leq 6 \ln K) \\
 &\leq M_{\tau^v}(v) && \text{(property 3)} \\
 &\leq M_{\lceil 6 \ln K \rceil}(v), && \text{(property 1)}
 \end{aligned}$$

contradicting property 1 and concluding our proof.  $\square$

**Lemma 17.** *Let  $\mathcal{C}(v), U(v), M(v)$  be the results of Centers-to-Components. Then the following properties hold for all simple agents  $v \in V \setminus C$  such that  $2 \leq \min_{c \in C} \text{dist}_G(v, c) \leq 6 \ln K - 1$ :*

1.  $\mathcal{C}(v) \neq \text{nil}$  and  $U(v) \neq \text{nil}$ .
2.  $M(v) = e^{-\frac{1}{6}} M(U(v))$ .
3.  $\mathcal{C}(v) = \mathcal{C}(U(v))$ .

*Proof.* Let  $v \in V$  be a simple agent such that  $\tau^v = \min_{c \in C} \text{dist}_G(v, c) \leq 6 \ln K - 1$ .

1. We have

$$\begin{aligned}
 M(v) &= M_{\Theta_K+1}(v) \\
 &\geq M_{\tau^v}(v) && \text{(property 1 of Lemma 16)} \\
 &> 0, && \text{(property 3 of Lemma 16)}
 \end{aligned}$$

and thus it follows from the algorithm that  $\mathcal{C}(v) \neq \text{nil}$  and  $U(v) \neq \text{nil}$  as desired.

2. Since  $\tau^{U(v)} \leq \tau^v + 1 \leq 6 \ln K$ , we get:

$$\begin{aligned}
 M(v) &= M_{\Theta_K+1}(v) \\
 &= e^{-\frac{1}{6}} M_{\Theta_K}(U(v)) && \text{(from the algorithm)} \\
 &= e^{-\frac{1}{6}} M_{\Theta_K+1}(U(v)) && \text{(property 4 of Lemma 16)} \\
 &= e^{-\frac{1}{6}} M(U(v)).
 \end{aligned}$$

3. Using property 4 of Lemma 16 again, we obtain

$$\mathcal{C}(v) = \mathcal{C}_{\Theta_K}(U(v)) = \mathcal{C}_{\Theta_K+1}(U(v)) = \mathcal{C}(U(v)).$$

$\square$

The next lemma shows that all simple agents choose the best possible agent as their origin neighbor.

**Lemma 18.** *Let  $U(v)$  and  $M(v)$  be the results of Centers-to-Components. Then for all simple agents  $v \in V \setminus C$  such that  $2 \leq \min_{c \in C} \text{dist}_G(v, c) \leq 6 \ln K - 1$ :*

$$U(v) = \arg \max_{v' \in \mathcal{N}(v)} M(v')$$

*Proof.* Simple agents choose their origin neighbor to be the one with maximal mass at iteration  $\Theta_K = \lfloor 12 \ln K \rfloor$ . In addition, since  $\tau^v = \min_{c \in C} \text{dist}_G(v, c) \leq 6 \ln K - 1$  we obtain  $\tau^{U(v)} \leq \tau^v + 1 \leq 6 \ln K$ , so we can use property 4 of Lemma 16 and get:

$$M(U(v)) = M_{\Theta_K+1}(U(v)) = M_{\Theta_K}(U(v)) \geq M_{\Theta_K}(v') = M_{\Theta_K+1}(v') = M(v')$$

as desired.  $\square$



### Proof of Lemma 6

**Lemma 6.** *Let  $C \subseteq V$  be a center set that is 2-independent, such that every  $v \in V$  holds  $\min_{c \in C} \text{dist}_G(v, c) \leq 6 \ln K - 1$ . Let  $\mathcal{C}(v)$ ,  $U(v)$ ,  $M(v)$  be the results of Centers-to-Components. For each  $c \in C$ , let  $V_c$  be its corresponding component, namely,  $V_c = \{v \in V \mid \mathcal{C}(v) = c\}$ . Then the following properties are satisfied:*

1.  $\{V_c \mid c \in C\}$  are pairwise disjoint and  $V = \bigcup_{c \in C} V_c$ .
2.  $\mathcal{N}(c) \subseteq V_c$  and  $G_c$  is connected for all  $c \in C$ .
3.  $M(v) = e^{-\frac{1}{6}d(v)} M(\mathcal{C}(v))$  and  $U(v) = \arg \min_{v' \in \mathcal{N}(v) \cap V_{\mathcal{C}(v)}} d(v')$  for all  $v \in V \setminus C$ .

*Proof.*

1. The components are trivially disjoint from the way we defined them. Since for any  $v \in V$  we assume  $\tau^v = \min_{c \in C} \text{dist}_G(v, c) \leq 6 \ln K - 1$ , we obtain from property 1 of Lemma 17 that  $\mathcal{C}(v) \neq \text{nil}$  and  $v \in \bigcup_{c \in C} V_c$  as desired.
2. Since  $C$  is 2-independent, it directly follows from the algorithm that  $\mathcal{N}(c) \subseteq V_c$  for all  $c \in C$ . Now, let  $v \in V$ . For a path of connected agents  $v = u_0, \dots, u_m$  such that  $u_{i+1} = U(u_i)$  for any  $i < m$ , we get from property 3 of Lemma 17 that  $\mathcal{C}(u_i) = \mathcal{C}(v)$  for all  $i$ . From property 2 of Lemma 17 we also obtain that  $M(u_i) < M(u_{i+1})$  for all  $i < m$  such that  $u_i \notin C$ , and thus all non-center agents on the path must be different. Hence, if  $m \geq N$  we obtain that there must be a center  $u$  on the path, and since  $u = \mathcal{C}(u) = \mathcal{C}(v)$ , we get that  $\mathcal{C}(v)$  must be connected to  $v$ . We obtain that all agents are connected to their center, and thus  $G_c$  is connected for all  $c \in C$  as claimed.
3. We proceed by induction on  $d(v) = \text{dist}_{G_{\mathcal{C}(v)}}(v, \mathcal{C}(v))$ . If  $d(v) = 1$  (i.e.,  $v$  is center-adjacent), the statement trivially follows from the algorithm. Otherwise, we assume the statement is true for all  $v' \in V \setminus C$  such that  $d(v') < d(v)$ . Since  $G_{\mathcal{C}(v)}$  is connected from property 2, there must be some  $v' \in \mathcal{N}(v) \cap V_{\mathcal{C}(v)}$  such that  $d(v) = d(v') + 1$ , and thus we get from the induction assumption that  $M(v') = e^{-\frac{1}{6}d(v')} M(\mathcal{C}(v))$ . From Lemma 18, we get that  $M(U(v)) \geq M(v')$ , and using property 2 of Lemma 17 we obtain

$$M(v) \geq e^{-\frac{1}{6}} M(v') = e^{-\frac{1}{6}(d(v')+1)} M(\mathcal{C}(v)) = e^{-\frac{1}{6}d(v)} M(\mathcal{C}(v)). \quad (1)$$

As before, from Lemma 17 there is a path  $v = u_0, \dots, u_m = \mathcal{C}(v)$  from  $v$  to its center such that  $U(u_i) = u_{i+1}$  for any  $i < m$  and  $\mathcal{C}(u_i) = \mathcal{C}(v)$  for all  $i$ . We must have  $m \geq \text{dist}_{G_{\mathcal{C}(v)}}(v, \mathcal{C}(v)) = d(v)$ , and using property 2 of Lemma 17 iteratively we get

$$M(v) = e^{-\frac{1}{6}} M(u_1) = \dots = e^{-\frac{1}{6}m} M(\mathcal{C}(v)) \leq e^{-\frac{1}{6}d(v)} M(\mathcal{C}(v)).$$

Combining with Eq. (1) we get  $M(v) = e^{-\frac{1}{6}d(v)} M(\mathcal{C}(v))$  as desired. From property 3 of Lemma 17 we have  $U(v) \in \mathcal{N}(v) \cap V_{\mathcal{C}(v)}$ , and using Lemma 18 we get

$$\begin{aligned} U(v) &= \arg \max_{v' \in \mathcal{N}(v) \cap V_{\mathcal{C}(v)}} M(v') \\ &= \arg \max_{v' \in \mathcal{N}(v) \cap V_{\mathcal{C}(v)}} e^{-\frac{1}{6}d(v')} M(\mathcal{C}(v)) \\ &= \arg \min_{v' \in \mathcal{N}(v) \cap V_{\mathcal{C}(v)}} d(v'), \end{aligned}$$

concluding our proof. □

## C Proofs from Subsection 5.3

### Proof of Lemma 7

**Lemma 7.** *Let  $C \subseteq V$  be the center set returned by Compute-Centers-Informed. Then:*

1.  $C$  is 2-independent.
2. For all  $v \in V$ ,  $\min_{c \in C} \text{dist}_G(v, c) \leq 6 \ln K - 1$ .

*Proof.*

1. The statement follows directly from the fact the agent  $v$  that is added to the center set at iteration  $t$  holds  $\min_{c \in C_t} \text{dist}_G(v, c) \geq 3$ .
2. When the algorithm terminates there are no unsatisfied agents. Hence, for all  $v \in V$ , either  $\min_{c \in C} \text{dist}_G(v, c) \leq 2$ , in which case we are done, or  $M(v) \geq \min\{|\mathcal{N}(v)|, K\} \geq 2$ . In the latter case we obtain from properties 1 and 2 of Lemma 16:

$$2 \leq M(v) = \exp\left(-\frac{1}{6} \text{dist}_G(v, \mathcal{C}(v))\right) M(\mathcal{C}(v)) \leq \exp\left(-\frac{1}{6} \text{dist}_G(v, \mathcal{C}(v))\right) K,$$

and thus  $\min_{c \in C} \text{dist}_G(v, c) \leq 6 \ln K - 1$  as desired. □

### Proof of Theorem 8

**Theorem 8.** *Let  $C \subseteq V$  be the center set returned by Compute-Centers-Informed, and let  $\{V_c \subseteq V \mid c \in C\}$  be the components resulted from Centers-to-Components. For every  $v \in V$ :*

$$M(v) \geq e^{-1} \min\{|\mathcal{N}(v)|, K\}.$$

*Proof.* For any center  $v \in C$  this is trivial. Since all agents are satisfied when the algorithm terminates, each  $v \in V \setminus C$  must either hold  $M(v) \geq \min\{|\mathcal{N}(v)|, K\}$  or  $\min_{c \in C} \text{dist}_G(v, c) \leq 2$ . Hence, we only need to prove the claim for each non-center agent  $v \in V \setminus C$  in distance at most 2 from the center set.

We first inspect the case that the agent is not center-adjacent, namely,  $\min_{c \in C} \text{dist}_G(v, c) = 2$ . Let  $t_0$  be the last iteration such that  $\min_{c \in C_{t_0}} \text{dist}_G(v, c) \geq 3$ . Note that this means  $\text{dist}_G(v, c_{t_0}) = 2$ . In the case that  $v \notin S_{t_0}$ ,  $v$  is satisfied, and since  $\min_{c \in C_{t_0}} \text{dist}_G(v, c) \geq 3$ , it must hold  $M_{t_0}(v) \geq \min\{|\mathcal{N}(v)|, K\}$ . Also,  $c_{t_0} \in S_{t_0}$  and thus  $3 \leq \min_{c \in C_{t_0}} \text{dist}_G(c_{t_0}, c)$  and  $M_{t_0}(c_{t_0}) < \min\{|\mathcal{N}(c_{t_0})|, K\}$ . Now, property 2 of Lemma 16 gives

$$\exp\left(-\frac{1}{6} \min_{c \in C_{t_0}} \text{dist}_G(v, c)\right) K \geq M_{t_0}(v) \geq \min\{|\mathcal{N}(v)|, K\}.$$

Recall that  $v \in \mathcal{N}(v)$ , so  $|\mathcal{N}(v)| \geq 2$  and thus  $\exp\left(-\frac{1}{6} \min_{c \in C_{t_0}} \text{dist}_G(v, c)\right) K \geq 2$ . Hence,  $3 \leq \min_{c \in C_{t_0}} \text{dist}_G(v, c) \leq 6 \ln K - 6 \ln 2 \leq 6 \ln K - 4$  and thus  $3 \leq \min_{c \in C_{t_0}} \text{dist}_G(c_{t_0}, c) \leq 6 \ln K - 2$ . Let  $u$  be an agent that is a common neighbor of  $v$  and  $c_{t_0}$ , namely,  $u \in \mathcal{N}(v) \cap \mathcal{N}(c_{t_0})$ . We obtain  $2 \leq \min_{c \in C_{t_0}} \text{dist}_G(u, c) \leq 6 \ln K - 3$  as well. We can now use Lemma 18 on  $c_{t_0}$  and  $u$  to obtain

$$\min\{|\mathcal{N}(c_{t_0})|, K\} > M_{t_0}(c_{t_0}) \geq e^{-\frac{1}{6}} M_{t_0}(u) \geq e^{-\frac{2}{6}} M_{t_0}(v) \geq e^{-\frac{2}{6}} \min\{|\mathcal{N}(v)|, K\}.$$

In the other case that  $v \in S_{t_0}$ , since  $c_{t_0} = \arg \max_{v' \in S_{t_0}} |\mathcal{N}(v')|$ , we obtain  $|\mathcal{N}(v)| \leq |\mathcal{N}(c_{t_0})|$ , and anyway  $\min\{|\mathcal{N}(c_{t_0})|, K\} \geq e^{-\frac{2}{6}} \min\{|\mathcal{N}(v)|, K\}$ . In all further iterations  $t > t_0$ , we can use Lemma 18 on  $v$  to obtain

$$M_t(v) \geq e^{-\frac{1}{6}} M_t(u) = e^{-\frac{2}{6}} \min\{|\mathcal{N}(c_{t_0})|, K\} \geq e^{-\frac{4}{6}} \min\{|\mathcal{N}(v)|, K\},$$

as desired.

Now we look at the case where  $v$  is center-adjacent and  $\min_{c \in C} \text{dist}_G(v, c) = 1$ . Again, let  $t_0$  be the last iteration such that  $\min_{c \in C_{t_0}} \text{dist}_G(v, c) \geq 2$ , and thus  $\text{dist}_G(v, c_{t_0}) = 1$ . In the case that  $v \notin S_{t_0}$ , either  $M_{t_0}(v) \geq \min\{|\mathcal{N}(v)|, K\}$  or  $\min_{c \in C_{t_0}} \text{dist}_G(v, c) = 2$ , in which case we obtain from before that  $M_{t_0}(v) \geq e^{-\frac{4}{6}} \min\{|\mathcal{N}(v)|, K\}$ . As before, we can use Lemma 18 on  $c_{t_0}$  and get

$$\min\{|\mathcal{N}(c_{t_0})|, K\} > M_{t_0}(c_{t_0}) \geq e^{-\frac{1}{6}} M_{t_0}(v) \geq e^{-\frac{5}{6}} \min\{|\mathcal{N}(v)|, K\}.$$

In the other case that  $v \in S_{t_0}$ , again we obtain  $\min\{|\mathcal{N}(c_{t_0})|, K\} \geq e^{-\frac{5}{6}} \min\{|\mathcal{N}(v)|, K\}$ . In all further iterations  $t > t_0$ , we get

$$M_t(v) = e^{-\frac{1}{6}} \min\{|\mathcal{N}(c_{t_0})|, K\} \geq e^{-1} \min\{|\mathcal{N}(v)|, K\},$$

concluding our proof.  $\square$

## D Proofs from Subsection 5.4

We first present the next lemma, which will help us with the analysis of Compute-Centers-Uninformed. In the following, we denote  $\Delta^v = K - \min\{|\mathcal{N}(v)|, K\}$ .

**Lemma 19.** *Let  $C \subseteq V$  be the center set returned by Compute-Centers-Uninformed, and let  $\{V_c \subseteq V \mid c \in C\}$  be the components resulted from Centers-to-Components. For any  $v \in V$  such that  $v \notin S_{\Delta^v}$ , either  $M(v) \geq \min\{|\mathcal{N}(v)|, K\}$ , or there is some  $c \in C$  such that  $|\mathcal{N}(c)| \geq e^{-\frac{1}{6}} |\mathcal{N}(v)|$  and  $\text{dist}_G(v, c) \leq 2$ .*

*Proof.* Let  $v \in V$  be an agent such that  $v \notin S_{\Delta^v}$ . At iteration  $\Delta^v - 1$ , it follows directly from the algorithm that either  $\min_{c \in C_{\Delta^v-1}} \text{dist}_G(v, c) \leq 2$  or  $M_{\Delta^v-1}(v) \geq \min\{|\mathcal{N}(v)|, K\}$ . In the first case, since  $|\mathcal{N}(v)| \leq |\mathcal{N}(c)|$  for all  $c \in C_{\Delta^v-1} \subseteq C$ , we are done.

Otherwise, we denote by  $c^v = \mathcal{C}_{\Delta^v-1}(v) \neq \text{nil}$  the center of agent  $v$  at iteration  $\Delta^v - 1$ . Note that from properties 1 and 2 of Lemma 16, we obtain:

$$e^{-\frac{1}{6} \text{dist}_G(v, c^v)} M(c^v) \geq M_{\Delta^v-1}(v) \geq \min\{|\mathcal{N}(v)|, K\} \geq 2,$$

and thus  $\text{dist}_G(v, c^v) \leq 6 \ln K - 1$ . From Lemma 17, we get that  $\mathcal{C}_{\Delta^v-1}(U_{\Delta^v-1}(v)) = c^v$  and

$$\begin{aligned} e^{-\frac{1}{6} \text{dist}_G(U_{\Delta^v-1}(v), c^v)} M(c^v) &\geq M_{\Delta^v-1}(U_{\Delta^v-1}(v)) \\ &= e^{\frac{1}{6}} M_{\Delta^v-1}(v) \\ &\geq \min\{|\mathcal{N}(v)|, K\} \\ &\geq 2. \end{aligned}$$

Thus, we get  $\text{dist}_G(U_{\Delta^v-1}(v), c^v) \leq 6 \ln K - 1$  as well. Using this fact iteratively, we get that there is a path  $v = u_0, \dots, u_m = c^v$  such that  $U_{\Delta^v-1}(u_i) = u_{i+1}$ ,  $\text{dist}_G(u_i, c^v) \leq 6 \ln K - 1$  and  $M_{\Delta^v-1}(u_{i+1}) = e^{\frac{1}{6}} M_{\Delta^v-1}(u_i)$  for any  $i < m$ . Notice that this also means  $M_{\Delta^v-1}(v) = e^{-\frac{1}{6}m} M(c^v)$ .

Now, assume to the contrary some simple agent on the path other than  $v$  becomes a center or center-adjacent after iteration  $\Delta^v - 1$ , and let  $u_j$  be the first such agent, where  $1 \leq j < m - 1$ . Let  $u \in \mathcal{N}(u_j)$  be the neighbor of  $u_j$  that joins the center set. Note that since  $\Delta^u \geq \Delta^v$ , we obtain  $|\mathcal{N}(u)| \leq |\mathcal{N}(v)|$ . At iteration  $\Delta^u - 1$ , all agents in the path are still simple agents (except  $c^v$  and  $u_{m-1}$ ), so we can use Lemma 18 iteratively to obtain

$$\begin{aligned} M_{\Delta^u-1}(u) &\geq e^{-\frac{1}{6}} M_{\Delta^u-1}(u_j) \\ &\geq \dots \geq e^{-\frac{1}{6}(m-j)} M(u_{m-1}) \\ &= e^{-\frac{1}{6}(m-j+1)} M(c^v) \\ &\geq e^{-\frac{1}{6}m} M(c^v) \\ &= M_{\Delta^v-1}(v) \\ &\geq \min\{|\mathcal{N}(v)|, K\} \\ &\geq \min\{|\mathcal{N}(u)|, K\}. \end{aligned}$$

Hence,  $u \notin S_{\Delta^v}$  which gives  $u \notin C_{\Delta^u}$ , and thus  $u_j$  remains a simple agent. We get that all simple agents on the path at iteration  $\Delta^v - 1$  except  $v$  must remain simple agents when the algorithm terminates. If  $v$  remain a simple agent as well, we obtain from Lemma 18 that

$$M(v) \geq e^{-\frac{1}{6}} M(u_1) \geq \dots \geq e^{-\frac{1}{6}m} M(c^v) = M_{\Delta^v-1}(v) \geq \min\{|\mathcal{N}(v)|, K\}$$

as desired. We are left with the case that some  $u \in \mathcal{N}(v)$  becomes a center after iteration  $\Delta^v$ , and thus  $M_{\Delta^v-1}(u) < \min\{|\mathcal{N}(u)|, K\}$ . We can again use Lemma 18 iteratively to get

$$\begin{aligned} \min\{|\mathcal{N}(u)|, K\} &> M_{\Delta^u-1}(u) \\ &\geq e^{-\frac{1}{6}} M_{\Delta^u-1}(v) \\ &\geq \dots \geq e^{-\frac{1}{6}m} M(u_{m-1}) \\ &= e^{-\frac{1}{6}(m+1)} M(c^v) \\ &= e^{-\frac{1}{6}} M_{\Delta^v-1}(v) \\ &\geq e^{-\frac{1}{6}} \min\{|\mathcal{N}(v)|, K\}, \end{aligned}$$

concluding our proof.  $\square$

### Proof of Lemma 10

**Lemma 10.** *Compute-Centers-Uninformed runs for less than  $12K \ln(K^2 \bar{N}T)$  steps.*

*Proof.* There are  $K$  iterations in Compute-Centers-Uninformed, such that at each iteration the agents run Luby's algorithm for  $4 \left\lceil 3 \ln(\bar{N} \sqrt{KT}) \right\rceil$  steps, and Centers-to-Components for  $\Theta_K + 1 = \lfloor 12 \ln K \rfloor + 1$  steps. We obtain that Compute-Centers-Uninformed terminates after

$$\left(4 \left\lceil 3 \ln(\bar{N} \sqrt{KT}) \right\rceil + \lfloor 12 \ln K \rfloor + 1\right) K \leq 12K \ln(K^2 \bar{N}T)$$

steps.  $\square$

### Proof of Lemma 11

**Lemma 11.** *Let  $C \subseteq V$  be the center set resulted from Compute-Centers-Uninformed, such that Luby's algorithm succeeded at all iterations of the algorithm. Then:*

1.  $C$  is 2-independent.
2. For all  $v \in V$ ,  $\min_{c \in C} \text{dist}_G(v, c) \leq 6 \ln K - 1$ .

*Proof.*

1. We get that at each iteration, a 2-independent set is added to the center set, such that every agent  $v$  in that set holds  $\min_{c \in C_{t-1}} \text{dist}_G(v, c) \geq 3$ . Hence, the final center set is 2-independent as claimed.
2. From Lemma 19 we have either  $\min_{c \in C} \text{dist}_G(v, c) \leq 2$ , in which case we are done, or  $M(v) \geq \min\{|\mathcal{N}(v)|, K\} \geq 2$ . In the latter case we obtain:

$$\begin{aligned} 2 &\leq M(v) \\ &\leq \exp\left(-\frac{1}{6} \text{dist}_G(v, \mathcal{C}(v))\right) M(\mathcal{C}(v)) \quad (\text{Properties 1 and 2 of Lemma 16}) \\ &\leq \exp\left(-\frac{1}{6} \text{dist}_G(v, \mathcal{C}(v))\right) K, \end{aligned}$$

and thus  $\min_{c \in C} \text{dist}_G(v, c) \leq 6 \ln K - 1$  as desired.  $\square$

### Proof of Theorem 12

**Theorem 12.** *Let  $C \subseteq V$  be the center set resulted from Compute-Centers-Uninformed, such that Luby's algorithm succeeded at all iterations of the algorithm, and also let  $\{V_c \subseteq V \mid c \in C\}$  be the components resulted from Centers-to-Components. For every  $v \in V$ :*

$$M(v) \geq e^{-1} \min\{|\mathcal{N}(v)|, K\}.$$

*Proof.* In the case that  $v \in S_{\Delta^v}$ , since  $W_{\Delta^v}$  is a maximal 2-independent set of  $S_{\Delta^v}$ , we get that either  $v \in W_{\Delta^v} \subseteq C$  or  $\text{dist}_G(v, v') \leq 2$  for some  $v' \in W_{\Delta^v} \subseteq C$ . In the case that  $v \notin S_{\Delta^v}$ , we obtain from Lemma 19 that either  $M(v) \geq \min\{|\mathcal{N}(v)|, K\}$ , in which case we are done, or there is some center  $c' \in C$  such that  $\text{dist}_G(v, c') \leq 2$  and  $e^{-\frac{1}{6}} \min\{|\mathcal{N}(v)|, K\} \leq \min\{|\mathcal{N}(c')|, K\}$ .

Hence we only need to prove the theorem for the case that there is some center  $c' \in C$  such that  $\text{dist}_G(v, c') \leq 2$  and  $e^{-\frac{1}{6}} \min\{|\mathcal{N}(v)|, K\} \leq \min\{|\mathcal{N}(c')|, K\}$ . We first inspect the case that  $v$  is not a center or center-adjacent. Let  $u$  be an agent that is a common neighbor of  $v$  and  $c'$ , namely,  $u \in \mathcal{N}(v) \cap \mathcal{N}(c')$ . Lemma 18 yields

$$M(v) \geq e^{-\frac{1}{6}} M(u) = e^{-\frac{2}{6}} \min\{|\mathcal{N}(c')|, K\} \geq e^{-\frac{3}{6}} \min\{|\mathcal{N}(v)|, K\},$$

as desired. If  $v$  is a center the claim is trivial, so we are left with the case that  $v$  is center-adjacent to a center  $c \in C$ . Note that  $\text{dist}_G(c, c') \leq 3$ . If  $\min\{|\mathcal{N}(c')|, K\} \leq \min\{|\mathcal{N}(c)|, K\}$  we are done. Otherwise, in the case that  $\min\{|\mathcal{N}(c)|, K\} < \min\{|\mathcal{N}(c')|, K\}$ , we obtain

$$\begin{aligned} \min\{|\mathcal{N}(c)|, K\} &> M_{\Delta^{c-1}}(c) \\ &\geq e^{-\frac{3}{6}} M_{\Delta^{c-1}}(c') && \text{(iterative application of Lemma 18)} \\ &= e^{-\frac{3}{6}} \min\{|\mathcal{N}(c')|, K\} && (c' \in C_{\Delta^{c-1}}) \\ &\geq e^{-\frac{4}{6}} \min\{|\mathcal{N}(v)|, K\}. \end{aligned}$$

Hence,

$$M(v) = e^{-\frac{1}{6}} \min\{|\mathcal{N}(c)|, K\} \geq e^{-\frac{5}{6}} \min\{|\mathcal{N}(v)|, K\},$$

concluding our proof.  $\square$

### Proof of Corollary 13

**Corollary 13.** *Let  $T \geq K^2 \ln K$  and  $\bar{N} \geq N$ . Let  $C \subseteq V$  be the center set resulted from Compute-Centers-Uninformed, and let  $\{V_c \subseteq V \mid c \in C\}$  be the components resulted from Centers-to-Components. Using the center-based policy, we obtain for every  $v \in V$ :*

$$R_T(v) \leq 12 \left( K \ln(K^2 \bar{N} T) + \sqrt{(\ln K) \left( 1 + \frac{K}{|\mathcal{N}(v)|} \right) T} \right) + 1 = \tilde{O} \left( \sqrt{\left( 1 + \frac{K}{|\mathcal{N}(v)|} \right) T} \right).$$

*Proof.* Luby's algorithm succeeds with probability  $1 - \frac{1}{KT}$  at each iteration of Compute-Centers-Uninformed. Hence, from the union bound, it succeeds at all iterations with probability  $1 - \frac{1}{T}$ . In that case, from Lemma 11, we can use Theorem 5 and Theorem 12 to bound the expected regret of agent  $v$  after Compute-Centers-Uninformed finished by:

$$7 \sqrt{(\ln K) \frac{K}{M(v)} T} \leq 7 \sqrt{(\ln K) e \frac{K}{\min\{|\mathcal{N}(v)|, K\}} T} \leq 12 \sqrt{(\ln K) \left( 1 + \frac{K}{|\mathcal{N}(v)|} \right) T}.$$

From Lemma 10, Compute-Centers-Uninformed finishes after no more than  $12K \ln(K^2 \bar{N} T)$  steps, so the overall expected regret in this case is bounded by:

$$12 \left( K \ln(K^2 \bar{N} T) + \sqrt{(\ln K) \left( 1 + \frac{K}{|\mathcal{N}(v)|} \right) T} \right).$$

In the case that Luby's algorithm failed at one of the iterations, we can bound the regret by  $T$ , the maximal regret possible. Hence, we obtain the desired result:

$$\begin{aligned} R_T(v) &\leq 12 \left(1 - \frac{1}{T}\right) \left( K \ln(K^2 \bar{N} T) + \sqrt{(\ln K) \left(1 + \frac{K}{|\mathcal{N}(v)|}\right) T} \right) + \frac{1}{T} T \\ &\leq 12 \left( K \ln(K^2 \bar{N} T) + \sqrt{(\ln K) \left(1 + \frac{K}{|\mathcal{N}(v)|}\right) T} \right) + 1. \end{aligned}$$

□

## E Proofs from Subsection 5.5

### Proof of Corollary 14

**Corollary 14.** *Let  $T \geq K^2 \ln K$ . Let  $C \subseteq V$  be the center set resulted from Compute-Centers-Informed or Compute-Centers-Uninformed, and let  $\{V_c \subseteq V \mid c \in C\}$  be the components resulted from Centers-to-Components. Using the center-based policy, we get:*

$$\frac{1}{N} \sum_{v \in V} R_T(v) = \tilde{O} \left( \sqrt{\left(1 + \frac{K}{N} \alpha(G)\right) T} \right).$$

*Proof.* Using either Compute-Centers-Informed or Compute-Centers-Uninformed to partition the graph for the center-based policy, we get from Corollaries 9 and 13 that for all  $v \in V$ :

$$R_T(v) = \tilde{O} \left( \sqrt{\left(1 + \frac{K}{|\mathcal{N}(v)|}\right) T} \right).$$

Hence,

$$\frac{1}{N} \sum_{v \in V} R_T(v) = \tilde{O} \left( \frac{1}{N} \sum_{v \in V} \sqrt{\left(1 + \frac{K}{|\mathcal{N}(v)|}\right) T} \right) = \tilde{O} \left( \frac{1}{\sqrt{N}} \sqrt{\sum_{v \in V} \left(1 + \frac{K}{|\mathcal{N}(v)|}\right) T} \right),$$

where the last equality is due to the Cauchy-Schwarz inequality. Since  $\sum_{v \in V} \frac{1}{|\mathcal{N}(v)|} \leq \alpha(G)$  [Wei, 1981], we obtain:

$$\frac{1}{N} \sum_{v \in V} R_T(v) = \tilde{O} \left( \sqrt{\left(1 + \frac{K}{N} \sum_{v \in V} \frac{1}{|\mathcal{N}(v)|}\right) T} \right) = \tilde{O} \left( \sqrt{\left(1 + \frac{K}{N} \alpha(G)\right) T} \right)$$

as desired. □

## F Luby's algorithm

Let  $G = \langle V, E \rangle$  be an undirected connected graph and let  $U \subseteq V$ . We can find a 2-MIS of  $U$  in a distributed manner with high probability by using Luby's algorithm [Luby, 1986, Alon et al., 1986] on  $(G^2)|_U$ , detailed in Algorithm 6.

At each iteration of the algorithm, every agent in  $U$  picks a number uniformly from  $[0, 1]$ . Agents that picked the maximal number among their neighbors of distance 2 join the 2-MIS, and their neighbors of distance 2 stop participating. A 2-MIS is computed after  $T_\delta = \left\lceil 3 \ln \left( \frac{|V|}{\sqrt{\delta}} \right) \right\rceil$  iterations with probability  $1 - \delta$ .

To simulate communication over  $G^2$ , we use 2 steps to deliver a message. First, the agents send their message. Then, the agents send a message based on the messages they received in the previous step. In Luby's algorithm, agents only need to know the agent in their neighborhood with the maximal random number, or whether an agent in their neighborhood joined the MIS. Hence, every message has length of order  $\tilde{O}(1)$ .

---

**Algorithm 6** Luby's algorithm on  $(G^2)_{|U}$  - agent  $v$ 

---

**Parameters:** Agent set  $U \subseteq V$ ; Error probability  $\delta > 0$ .

**Initialize:** Participating agents  $P_0 = U$ .

```
1:  $T_\delta = \left\lceil 3 \ln \left( \frac{|V|}{\sqrt{\delta}} \right) \right\rceil$ 
2: for  $1 \leq t \leq T_\delta$  do
3:   if  $v \in P_t$  then
4:     Pick a number  $r_t^v$  uniformly from  $[0, 1]$ .
5:     Send the following message to the set  $\mathcal{N}(v)$ :  $m_{t,1}(v) = \langle v, t, 1, r_t^v \rangle$ .
6:   end if
7:   Receive all messages  $m_{t,1}(v')$  from  $v' \in \mathcal{N}(v)$ .
8:   if  $\mathcal{N}(v) \cap P_t \neq \emptyset$  then
9:     Set  $u_t = \arg \max_{v' \in \mathcal{N}(v) \cap P_t} (r_t^{v'})$ .
10:    Send the following message to the set  $\mathcal{N}(v)$ :  $m_{t,2}(v) = \langle u_t, t, 2, r_t^u \rangle$ .
11:  end if
12:  Receive all messages  $m_{t,2}(v')$  from  $v' \in \mathcal{N}(v)$ .
13:  if  $v = \arg \max_{v' \in P_t \wedge \text{dist}_G(v, v') \leq 2} (r_t^{v'})$  then
14:    Join the 2-MIS of  $U$ .
15:    Send the following message to the set  $\mathcal{N}(v)$ :  $m_{t,3}(v) = \langle v, t, 3, \text{JOINED} \rangle$ .
16:  end if
17:  Receive all messages  $m_{t,3}(v')$  from  $v' \in \mathcal{N}(v)$ .
18:  if  $\exists v' \in \mathcal{N}(v)$  ( $v'$  joined the 2-MIS) then
19:    Send the following message to the set  $\mathcal{N}(v)$ :  $m_{t,4}(v) = \langle v, t, 4, \text{NEIGHBOR-JOINED} \rangle$ .
20:  end if
21:  Receive all messages  $m_{t,4}(v')$  from  $v' \in \mathcal{N}(v)$ .
22:  if  $v \in P_t$  and  $\exists v' \in P_t$  ( $\text{dist}_G(v, v') \leq 2 \wedge v'$  joined the 2-MIS) then
23:    Stop participating:  $v \notin P_{t+1}$ .
24:  else if  $v \in P_t$  then
25:    Continue participating:  $v \in P_{t+1}$ .
26:  end if
27: end for
```

---

For completeness we also provide an overview of the analysis. It follows directly from the algorithm that it outputs an independent set of  $(G^2)_{|U}$ . We only need to show it is maximal with high probability, and we prove it using the following lemma (for proof, see [Luby, 1986, Alon et al., 1986]):

**Lemma 20.** *Let  $P_t \subseteq U$  be the set of participating agents at iteration  $t$  of Luby's algorithm on  $(G^2)_{|U}$ , and let  $m_t$  be the number of edges of  $(G^2)_{|P_t}$ . We obtain for all  $t \geq 1$ :*

$$\mathbb{E}[m_{t+1}] \leq \frac{1}{2} \mathbb{E}[m_t].$$

With this lemma we can now show Luby's algorithm indeed outputs a 2-MIS with high probability.

**Corollary 21.** *Let  $W \subseteq U$  be the result of Luby's algorithm on  $(G^2)_{|U}$ . Then with probability  $1 - \frac{1}{\delta}$ ,  $W$  is a 2-MIS of  $U$ .*

*Proof.* As we previously mentioned, we only need to show  $W$  is a maximal independent set with probability  $1 - \delta$ . This is equivalent to the statement that  $P_{T_\delta+1}$  is empty. If we denote the number of edges of  $(G^2)_{|P_t}$  by  $m_t$ , we get that it suffices to prove that  $m_{T_\delta} = 0$  with high probability. By an iterative application of Lemma 20 we obtain:

$$\mathbb{E}[m_{T_\delta}] \leq \frac{1}{2} \mathbb{E}[m_{T_\delta-1}] \leq \dots \leq \frac{1}{2^{T_\delta}} \mathbb{E}[m_0] \leq \frac{|V|^2}{2^{T_\delta}}.$$

Hence, we can conclude our proof with Markov's inequality:

$$\Pr[m_{T_\delta} \neq 0] = \Pr[m_{T_\delta} \geq 1] \leq \mathbb{E}[m_{T_\delta}] \leq \frac{|V|^2}{2^{T_\delta}} = \frac{|V|^2}{2^{\left\lceil 3 \ln \left( \frac{|V|}{\sqrt{\delta}} \right) \right\rceil}} \leq \delta.$$



---

**Algorithm 7** The exponential-weights algorithm (Exp3)

---

**Parameters:** Number of arms  $K$ ; Time horizon  $T$ ; Learning rate  $\eta(v)$ .

**Initialize:**  $w_1^v(i) \leftarrow \frac{1}{K}$  for all  $i \in A$ .

- 1: **for**  $1 \leq t \leq T$  **do**
- 2:   Set  $p_t^v(i) \leftarrow \frac{w_t^v(i)}{W_t^v}$  for all  $i \in A$ , where  $W_t^v = \sum_{i \in A} w_t^v(i)$ .
- 3:   Play an action  $I_t(v)$  drawn from  $\mathbf{p}_t^v = \langle p_t^v(1), \dots, p_t^v(K) \rangle$ .
- 4:   Observe loss  $\ell_t(I_t(v))$ .
- 5:   Update for all  $i \in A$ :  $w_{t+1}^v(i) \leftarrow w_t^v(i) \exp\left(-\eta(v) \hat{\ell}_t^v(i)\right)$ , where

$$\hat{\ell}_t^v(i) = \frac{\ell_t(i)}{\mathbb{E}_t[B_t^v(i)]} B_t^v(i),$$

and  $B_t^v(i)$  is the event that  $v$  observed  $\ell_t(I_t(v))$ .

- 6: **end for**
- 

□

## G Proofs from Section 2

For completeness, we give proofs for the preliminary lemmas. The exponential-weights algorithm is given in Algorithm 7.

### Proof of Lemma 1

**Lemma 1.** *Assuming agent  $v$  uses the exponential-weights algorithm, its expected regret satisfies*

$$R_T(v) \leq \frac{\ln K}{\eta(v)} + \frac{\eta(v)}{2} \mathbb{E} \left[ \sum_{t=1}^T \sum_{i=1}^K p_t^v(i) \hat{\ell}_t^v(i)^2 \right].$$

*Proof.* We have

$$\begin{aligned} \frac{W_{t+1}^v}{W_t^v} &= \sum_{i \in A} \frac{w_{t+1}^v(i)}{W_t^v} \\ &= \sum_{i \in A} \frac{w_t^v(i)}{W_t^v} \exp\left(-\eta(v) \hat{\ell}_t^v(i)\right) \\ &= \sum_{i \in A} p_t^v(i) \exp\left(-\eta(v) \hat{\ell}_t^v(i)\right) \\ &\leq \sum_{i \in A} p_t^v(i) \left(1 - \eta(v) \hat{\ell}_t^v(i) + \eta(v)^2 \hat{\ell}_t^v(i)^2\right) \quad (e^{-x} \leq 1 - x + \frac{1}{2}x^2 \text{ for } x \geq 0) \\ &= 1 - \eta(v) \sum_{i \in A} p_t^v(i) \hat{\ell}_t^v(i) + \frac{\eta(v)^2}{2} \sum_{i \in A} p_t^v(i) \hat{\ell}_t^v(i)^2. \end{aligned}$$

Taking logs and using  $\ln(1+x) \leq x$  we obtain

$$\ln \frac{W_{t+1}^v}{W_t^v} \leq -\eta(v) \sum_{i \in A} p_t^v(i) \hat{\ell}_t^v(i) + \frac{\eta(v)^2}{2} \sum_{i \in A} p_t^v(i) \hat{\ell}_t^v(i)^2.$$

Summing gives

$$\ln W_{T+1}^v \leq -\eta(v) \sum_{t=1}^T \sum_{i \in A} p_t^v(i) \hat{\ell}_t^v(i) + \frac{\eta(v)^2}{2} \sum_{t=1}^T \sum_{i \in A} p_t^v(i) \hat{\ell}_t^v(i)^2. \quad (2)$$

Now, for any fixed action  $k$  we also have

$$\ln W_{T+1}^v \geq \ln w_{T+1}^v(k) = -\eta(v) \sum_{t=1}^T \hat{\ell}_t^v(k) - \ln K.$$

Combining with Eq. (2) we obtain

$$\sum_{t=1}^T \sum_{i \in A} p_t^v(i) \hat{\ell}_t^v(i) - \sum_{t=1}^T \hat{\ell}_t^v(k) \leq \frac{\ln K}{\eta(v)} + \frac{\eta(v)^2}{2} \sum_{t=1}^T \sum_{i \in A} p_t^v(i) \hat{\ell}_t^v(i)^2.$$

This is true for every  $k \in A$ . Note that  $\mathbb{E}[\cdot] = \mathbb{E}[\mathbb{E}_t[\cdot]]$ , and since  $\mathbb{E}_t[\ell_t(I_t(v))] = \sum_{i \in A} p_t^v(i) \ell_t(i)$  and  $\mathbb{E}_t[\hat{\ell}_t^v(i)] = \ell_t(i)$ , we get

$$\begin{aligned} R_T(v) &= \mathbb{E} \left[ \sum_{t=1}^T \ell_t(I_t(v)) - \min_{i \in A} \sum_{t=1}^T \ell_t(i) \right] \\ &\leq \mathbb{E} \left[ \sum_{t=1}^T \ell_t(I_t(v)) \right] - \min_{i \in A} \mathbb{E} \left[ \sum_{t=1}^T \ell_t(i) \right] \\ &= \mathbb{E} \left[ \sum_{t=1}^T \sum_{i \in A} p_t^v(i) \hat{\ell}_t^v(i) \right] - \min_{i \in A} \mathbb{E} \left[ \sum_{t=1}^T \hat{\ell}_t^v(i) \right] \\ &\leq \frac{\ln K}{\eta(v)} + \frac{\eta(v)^2}{2} \mathbb{E} \left[ \sum_{t=1}^T \sum_{i \in A} p_t^v(i) \hat{\ell}_t^v(i)^2 \right] \end{aligned}$$

as desired.  $\square$

## Proof of Lemma 2

**Lemma 2.** Assuming agent  $v$  uses the exponential-weights algorithm with a learning rate  $\eta(v) \leq \frac{1}{2K}$ , then for all  $i \in A$ :

$$\left(1 - \eta(v) \hat{\ell}_t^v(i)\right) p_t^v(i) \leq p_{t+1}^v(i) \leq 2p_t^v(i).$$

*Proof.* From the exponential-weights update rule we have

$$\begin{aligned} p_{t+1}^v(i) &= \frac{w_{t+1}^v(i)}{W_{t+1}^v} \\ &= \frac{W_t^v}{W_{t+1}^v} \exp\left(-\eta(v) \hat{\ell}_t^v(i)\right) p_t^v(i) \\ &\geq \exp\left(-\eta(v) \hat{\ell}_t^v(i)\right) p_t^v(i) && (W_{t+1}^v \leq W_t^v) \\ &\geq \left(1 - \eta(v) \hat{\ell}_t^v(i)\right) p_t^v(i). && (1 - x \leq e^{-x}) \end{aligned}$$

as stated in the first inequality in the lemma. For the second inequality, note that

$$p_t^v(i) \hat{\ell}_t^v(i) = p_t^v(i) \frac{\ell_t(i)}{\mathbb{E}_t[B_t^v(i)]} B_t^v(i) \leq \frac{p_t^v(i)}{\mathbb{E}_t[B_t^v(i)]} \leq 1. \quad (3)$$

Hence,

$$\begin{aligned}
p_{t+1}^v(i) &= \frac{w_{t+1}^v(i)}{W_{t+1}^v} \\
&\leq \frac{w_t^v(i)}{W_{t+1}^v} \\
&= \frac{\sum_{j \in A} w_t^v(j)}{\sum_{j \in A} w_t^v(j) \exp\left(-\eta(v) \hat{\ell}_t^v(j)\right)} p_t^v(i) \\
&\leq \frac{\sum_{j \in A} w_t^v(j)}{\sum_{j \in A} w_t^v(j) \left(1 - \eta(v) \hat{\ell}_t^v(j)\right)} p_t^v(i) & (1 - x \leq e^{-x}) \\
&= \frac{1}{1 - \eta(v) \sum_{j \in A} p_t^v(j) \hat{\ell}_t^v(j)} p_t^v(i) \\
&\leq \frac{1}{1 - \eta(v) K} p_t^v(i). & \text{(Eq. (3))}
\end{aligned}$$

Assuming  $\eta(v) \leq \frac{1}{2K}$ , we obtain the desired bound. □
